# Supplementary material for: Taspase1 Facilitates Topoisomerase IIβ-Mediated DNA Double-Strand Breaks Driving Estrogen-Induced Transcription
Source: MDPI journal article supplement (doi:10.3390/cells12030363), 2023-01-18
Supplement: s1 [file s1]

Supplementary Materials

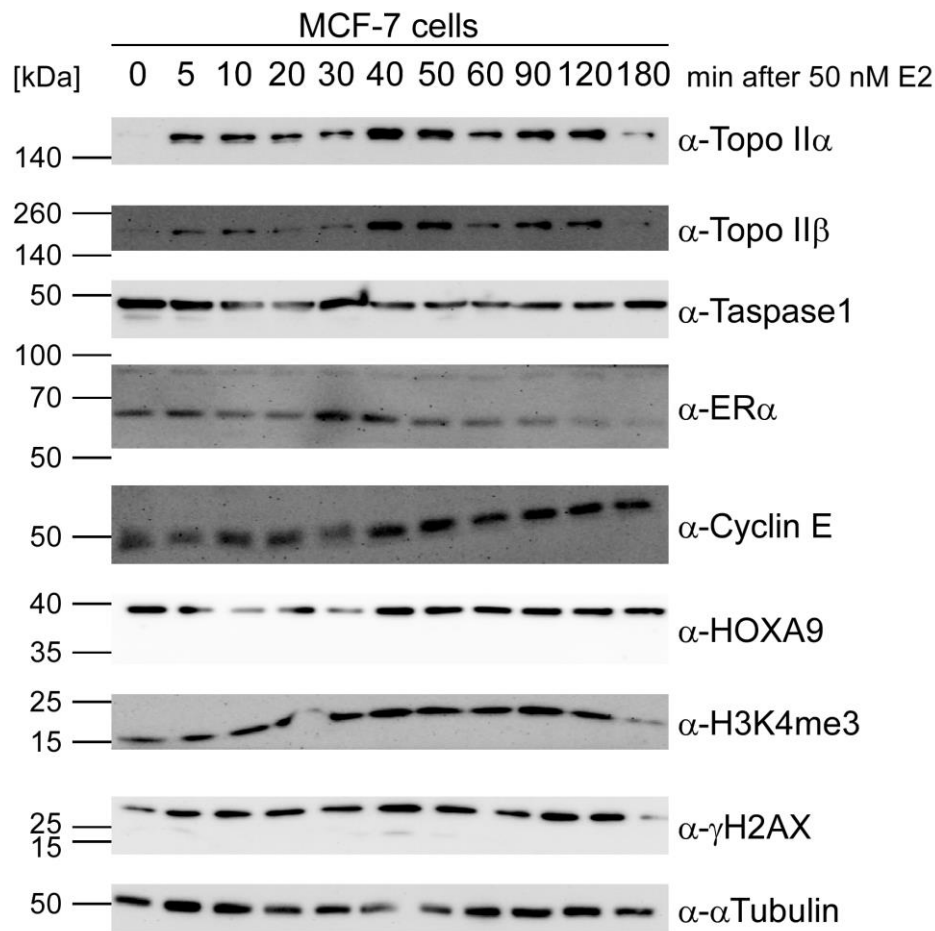

**Figure S1.** Estrogen response in MCF-7 cells. Protein expression level in MCF-7 cells after estrogen stimulation. RIPA cell lysates of MCF-7 cells were prepared at defined time points after 17 $\beta$ -estradiol (E2) treatment (50 nM) and analyzed for differential protein expression via immunoblotting and incubation with indicated antibodies.

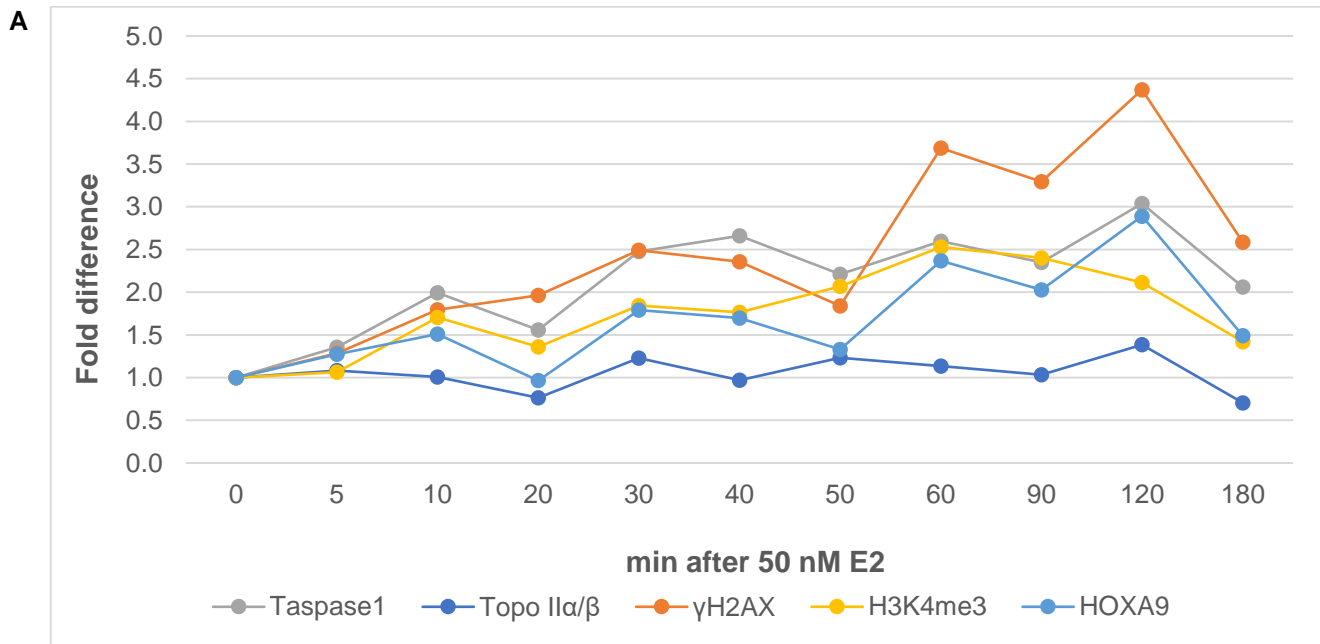

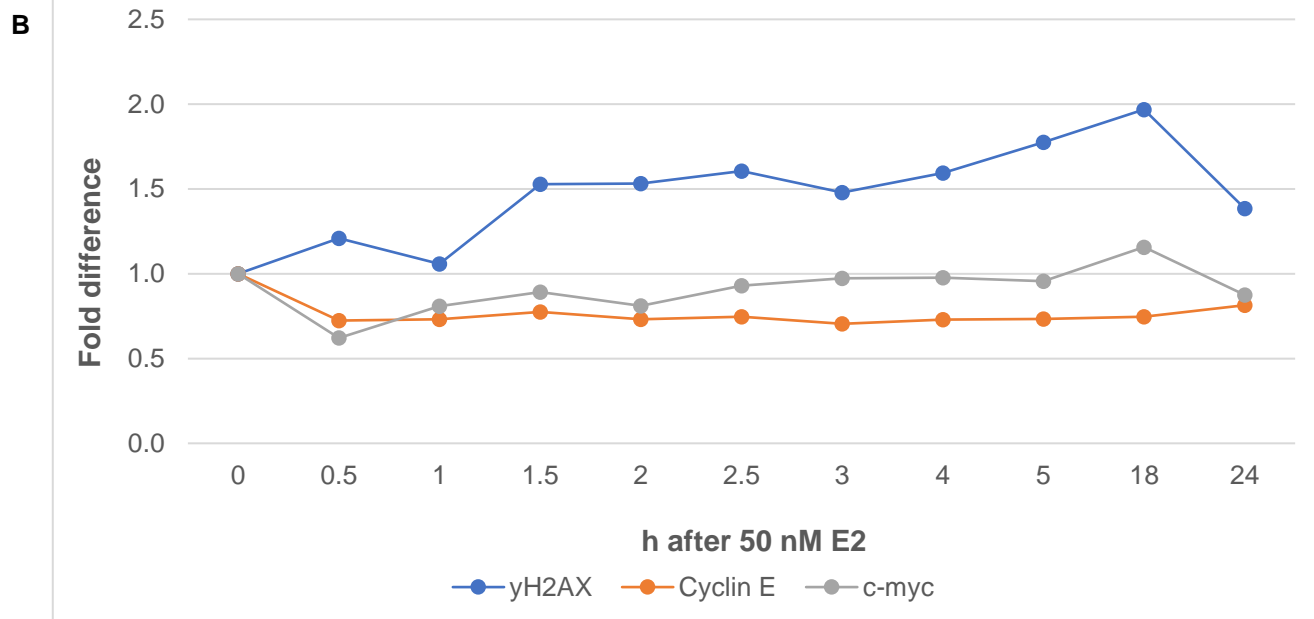

**Figure S2.** Densitometric quantification of E2 induction. The intensity of each band of the respective immunoblot of Figure 2A and Figure 2C were determined using Fiji. The amounts of the target protein were normalized to the loading control  $\alpha$ -Tubulin. The relative target protein levels were compared across the samples. The quantification results of Figure 2A and Figure 2C immunoblots are depicted in (A) and (B), respectively.

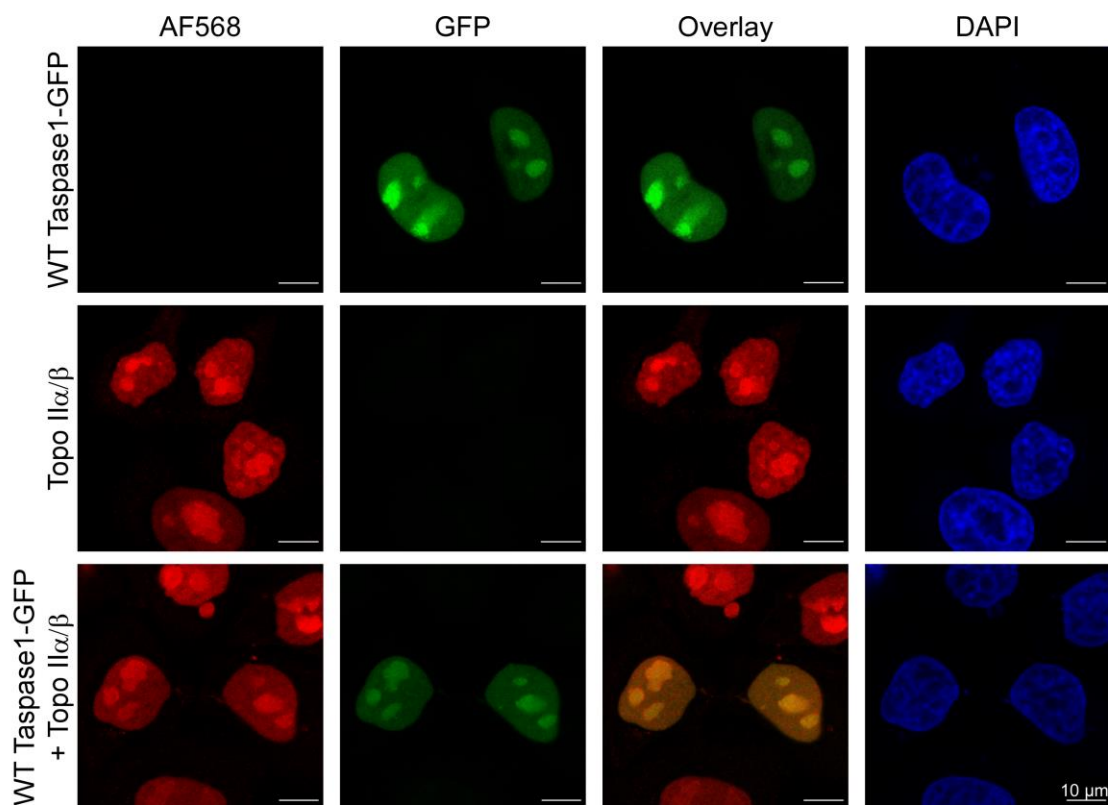

**Figure S3.** Taspase1 and Topo II co-localize in HeLa cells. Taspase1 and Topo II co-localize at the nuclei and nucleoli in HeLa cells. HeLa cells overexpressing WT Taspase1-GFP or untransfected cells were fixed and permeabilized and an immunofluorescence staining with a Topo II $\alpha/\beta$  antibody and a secondary goat anti-rabbit IgG-AF568 antibody was performed. Cells were counterstained with DAPI and microscopically analyzed with the confocal laser scanning microscope SP8X Falcon (Leica Microsystems). Taspase1-GFP is depicted in green, Topo II $\alpha/\beta$  in red and DNA in blue. Representative images are shown. Scale bar: 10  $\mu$ m.

**A**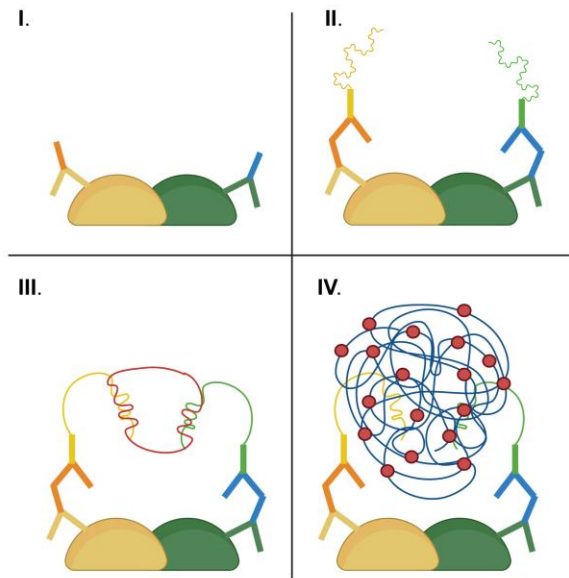**B**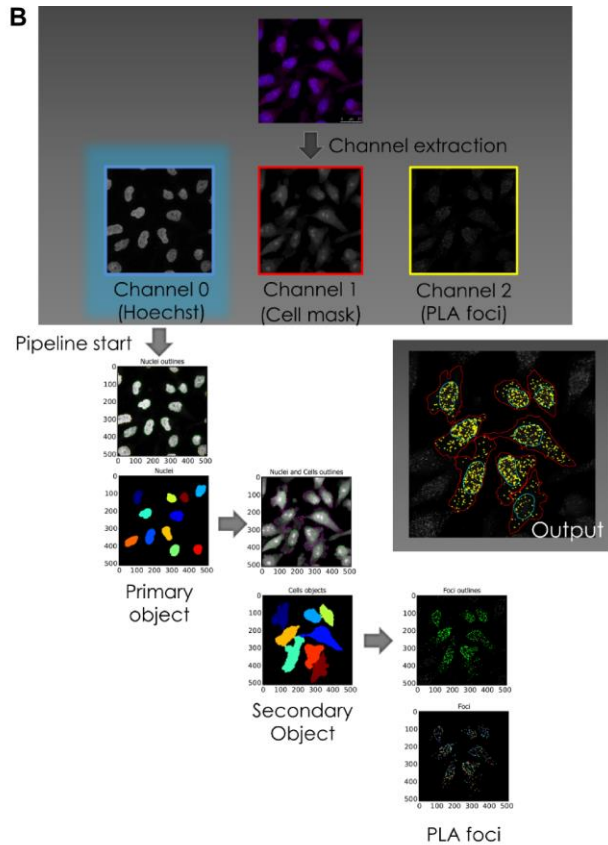

**Figure S4.** Schematic workflow of PLA procedure and image analysis pipeline. PLA procedure and image analysis by Cell Profiler. (A) The proteins of interest are recognized by their specific primary antibodies (I.). Secondary antibodies conjugated with oligonucleotides (PLA probes) bind the respective primary antibody (II.). If the target proteins interact with each other, they are in close proximity ( $<40$  nm), thereby allowing the connector oligonucleotides to hybridize with both PLA probes and a closed circle DNA template is formed by ligation (III.). These circular structures are amplified using fluorescently labeled oligonucleotides to gain well-defined fluorescent dots (PLA foci) (IV.). This illustration was created with BioRender.com. (B) PLA foci were quantified with the cell image analysis software Cell Profiler 4.1.3. The Hoechst-stained nuclei were utilized to define the primary objects (blue) and the staining of the plasma membrane with HCS CellMask™ Deep Red for the definition of the secondary objects (red). Afterwards, PLA foci (yellow) were counted and assigned to the cellular compartments.

**Table S1.** Proteins identified in Taspase1-GFP complexes by mass spectrometry.

| <b>-LOG (P-value)</b> | <b>Difference</b> | <b>Protein names</b>                                  | <b>Gene names</b> |
|-----------------------|-------------------|-------------------------------------------------------|-------------------|
| 1,4533                | 1,4459            | Protein AATF                                          | AATF              |
| 1,3894                | 0,7370            | ATP-binding cassette sub-family D member 3            | ABCD3             |
| 2,2353                | 2,5468            | Activator of basal transcription 1                    | ABT1              |
| 2,2388                | 2,4690            | Protein ELYS                                          | AHCTF1            |
| 2,5335                | 3,0525            | ATPase family AAA domain-containing protein 2         | ATAD2             |
| 3,2639                | 1,9490            | Bromodomain adjacent to zinc finger domain protein 1A | BAZ1A             |
| 1,5911                | 1,0452            | Tyrosine-protein kinase BAZ1B                         | BAZ1B             |
| 3,5857                | 2,5714            | Bromodomain adjacent to zinc finger domain protein 2A | BAZ2A             |
| 1,7551                | 1,4528            | Bloom syndrome protein                                | BLM               |
| 2,3170                | 2,2029            | Ribosome biogenesis protein BMS1 homolog              | BMS1              |
| 2,4213                | 1,6777            | Ribosome biogenesis protein BOP1                      | BOP1              |
| 2,2828                | 1,8470            | Nucleosome-remodeling factor subunit BPTF             | BPTF              |
| 3,1971                | 5,7335            | Ribosome biogenesis protein BRX1 homolog              | BRX1              |
| 2,2387                | 1,7486            | Bystin                                                | BYSL              |
| 1,7886                | 1,6806            | Leydig cell tumor 10 kDa protein homolog              | C19orf53          |
| 2,0007                | 1,4325            | Uncharacterized protein C7orf50                       | C7orf50           |
| 1,5284                | 0,8471            | Chromobox protein homolog 3                           | CBX3              |
| 2,7491                | 2,9865            | Chromobox protein homolog 5                           | CBX5              |
| 2,9865                | 1,8999            | Cell division cycle and apoptosis regulator protein 1 | CCAR1             |
| 2,3920                | 1,8936            | Coiled-coil domain-containing protein 137             | CCDC137           |
| 3,2868                | 3,1116            | Coiled-coil domain-containing protein 86              | CCDC86            |
| 2,9838                | 1,2425            | Coiled-coil domain-containing protein 94              | CCDC94            |
| 2,8792                | 2,3459            | Tumor suppressor ARF                                  | CDKN2A            |
| 3,1602                | 5,2704            | CCAAT/enhancer-binding protein zeta                   | CEBPZ             |
| 3,4640                | 3,3583            | Centromere protein V                                  | CENPV             |
| 4,0012                | 1,6876            | Chromatin assembly factor 1 subunit A                 | CHAF1A            |
| 1,6820                | 1,2356            | Charged multivesicular body protein 4b                | CHMP4B            |
| 2,7958                | 2,3254            | Coilin                                                | COIL              |
| 1,2392                | 1,2645            | Transcriptional repressor CTCF                        | CTCF              |
| 1,5579                | 2,5362            | Spliceosome-associated protein CWC15 homolog          | CWC15             |
| 1,6575                | 2,3532            | DDB1- and CUL4-associated factor 13                   | DCAF13            |
| 3,6214                | 4,1330            | Probable ATP-dependent RNA helicase DDX10             | DDX10             |
| 1,8640                | 1,1750            | Probable ATP-dependent RNA helicase DDX17             | DDX17             |
| 3,8437                | 2,3457            | ATP-dependent RNA helicase DDX18                      | DDX18             |
| 3,2941                | 1,9227            | Nucleolar RNA helicase 2                              | DDX21             |
| 2,2878                | 2,2877            | ATP-dependent RNA helicase DDX24                      | DDX24             |
| 3,8272                | 5,7230            | Probable ATP-dependent RNA helicase DDX27             | DDX27             |
| 2,3555                | 2,3129            | Probable ATP-dependent RNA helicase DDX31             | DDX31             |
| 3,8412                | 2,2557            | ATP-dependent RNA helicase DDX50                      | DDX50             |
| 2,6405                | 2,1053            | ATP-dependent RNA helicase DDX51                      | DDX51             |
| 2,5235                | 1,3294            | Probable ATP-dependent RNA helicase DDX52             | DDX52             |
| 2,8915                | 4,0868            | ATP-dependent RNA helicase DDX54                      | DDX54             |

|        |        |                                                             |             |
|--------|--------|-------------------------------------------------------------|-------------|
| 2,4602 | 2,6282 | Probable ATP-dependent RNA helicase DDX56                   | DDX56       |
| 2,9556 | 1,6690 | Putative ATP-dependent RNA helicase DHX30                   | DHX30       |
| 1,4653 | 1,7830 | Putative ATP-dependent RNA helicase DHX33                   | DHX33       |
| 1,4248 | 1,9336 | Probable ATP-dependent RNA helicase DHX37                   | DHX37       |
| 1,7726 | 2,4872 | DnaJ homolog subfamily C member 9                           | DNAJC9      |
| 2,9996 | 3,4663 | Deoxynucleotidyltransferase terminal-inter-acting protein 2 | DNTTIP2     |
| 2,1280 | 1,0841 | Protein dpy-30 homolog                                      | DPY30       |
| 4,8000 | 5,0413 | Probable rRNA-processing protein EBP2                       | EBNA1BP2    |
| 1,9080 | 1,2859 | Polycomb protein EED                                        | EED         |
| 1,6631 | 1,4313 | Histone-lysine N-methyltransferase EHMT1                    | EHMT1       |
| 2,8442 | 1,7448 | Histone-lysine N-methyltransferase EHMT2                    | EHMT2       |
| 2,3417 | 1,6139 | Eukaryotic translation initiation factor 6                  | EIF6        |
| 1,6847 | 1,6106 | Emerin                                                      | EMD         |
| 2,0667 | 0,9847 | Ribosomal RNA small subunit methyltrans-ferase NEP1         | EMG1        |
| 2,2262 | 3,3614 | ESF1 homolog                                                | ESF1        |
| 3,1632 | 2,4612 | Exosome component 10                                        | EXOSC10     |
| 2,9519 | 3,6399 | Exosome complex component RRP4                              | EXOSC2      |
| 1,6117 | 2,1803 | Exosome complex component RRP40                             | EXOSC3      |
| 1,9324 | 2,6287 | Exosome complex component RRP41                             | EXOSC4      |
| 3,7153 | 2,4533 | Exosome complex component MTR3                              | EXOSC6      |
| 1,9823 | 2,4380 | Exosome complex component RRP42                             | EXOSC7      |
| 2,6942 | 2,5019 | 40S ribosomal protein S30                                   | FAU         |
| 3,2244 | 4,7385 | rRNA 2-O-methyltransferase fibrillarin                      | FBL         |
| 4,8024 | 4,8114 | pre-rRNA processing protein FTSJ3                           | FTSJ3       |
| 2,2796 | 2,4053 | RNA-binding protein FUS                                     | FUS         |
| 1,7476 | 1,2681 | Fragile X mental retardation syndrome-re-lated protein 2    | FXR2        |
| 2,3209 | 2,5170 | Transcriptional repressor p66-alpha                         | GATAD2A     |
| 5,3776 | 5,7870 | Nucleolar GTP-binding protein 2                             | GNL2        |
| 3,1080 | 4,4706 | Guanine nucleotide-binding protein-like 3                   | GNL3        |
| 2,2115 | 0,7465 | G patch domain-containing protein 4                         | GPATCH4     |
| 3,7024 | 1,5834 | Glutamate-rich WD repeat-containing pro-tein 1              | GRWD1       |
| 1,6823 | 1,6750 | General transcription factor 3C polypeptide 1               | GTF3C1      |
| 1,8963 | 2,1141 | General transcription factor 3C polypeptide 2               | GTF3C2      |
| 3,1262 | 2,7694 | Nucleolar GTP-binding protein 1                             | GTPBP4      |
| 1,4253 | 1,2334 | Histone H1x                                                 | H1FX        |
| 2,3602 | 1,2364 | Core histone macro-H2A.2;Histone H2A                        | H2AFY2      |
| 1,3256 | 3,6191 | Histone H3;Histone H3.3                                     | H3F3B;H3F3A |
| 2,5558 | 3,2446 | High mobility group protein HMG-I/HMG-Y                     | HMGA1       |
| 1,8784 | 1,3071 | High mobility group protein HMGI-C                          | HMGA2       |
| 1,2209 | 1,3666 | Non-histone chromosomal protein HMG-14                      | HMGN1       |
| 1,6388 | 1,4234 | Heterogeneous nuclear ribonucleoprotein A0                  | HNRNPA0     |
| 2,5787 | 1,5488 | Heterogeneous nuclear ribonucleoprotein A1                  | HNRNPA1     |
| 3,7621 | 1,8814 | Heterogeneous nuclear ribonucleoproteins A2/B1              | HNRNPA2B1   |

|        |        |                                                                             |            |
|--------|--------|-----------------------------------------------------------------------------|------------|
| 3,0915 | 1,6334 | Heterogeneous nuclear ribonucleoprotein A3                                  | HNRNPA3    |
| 4,3729 | 3,1751 |                                                                             | HNRNPDL    |
| 1,4516 | 1,2002 | Heterogeneous nuclear ribonucleoprotein H3                                  | HNRNPH3    |
| 1,9890 | 0,5093 | Heterogeneous nuclear ribonucleoprotein L                                   | HNRNPL     |
| 6,3544 | 2,3546 | Heterogeneous nuclear ribonucleoprotein R                                   | HNRNPR     |
| 1,3737 | 0,8358 | Heterogeneous nuclear ribonucleoprotein U                                   | HNRNPU     |
| 3,1137 | 1,8892 | Heterogeneous nuclear ribonucleoprotein U-like protein 1                    | HNRNPUL1   |
| 1,7421 | 2,1135 | Protein Red                                                                 | IK         |
| 2,9789 | 1,0759 | Interleukin enhancer-binding factor 3                                       | ILF3       |
| 1,3468 | 1,0357 | U3 small nucleolar ribonucleoprotein protein IMP4                           | IMP4       |
| 2,0401 | 1,4577 | Inner centromere protein                                                    | INCENP     |
| 1,7065 | 2,1915 | Interferon-stimulated 20 kDa exonuclease-like 2                             | ISG20L2    |
| 3,8081 | 2,6055 | KH domain-containing, RNA-binding, signal transduction-associated protein 1 | KHDRBS1    |
| 3,0654 | 5,1239 | Pumilio domain-containing protein KIAA0020                                  | KIAA0020   |
| 2,6767 | 2,3267 | Protein virilizer homolog                                                   | KIAA1429   |
| 2,5467 | 1,1927 | Kinesin-like protein KIF18B                                                 | KIF18B     |
| 2,1445 | 2,0079 | Protein KRI1 homolog                                                        | KRI1       |
| 2,6682 | 3,4815 | KRR1 small subunit processome component homolog                             | KRR1       |
| 3,1549 | 1,5708 | La-related protein 7                                                        | LARP7      |
| 3,3361 | 2,1252 | Ribosomal biogenesis protein LAS1L                                          | LAS1L      |
| 2,4959 | 2,3177 | DNA ligase 3                                                                | LIG3       |
| 1,9398 | 1,3669 | Protein lin-28 homolog B                                                    | LIN28B     |
| 2,2276 | 2,4426 | Cell growth-regulating nucleolar protein                                    | LYAR       |
| 3,0941 | 3,5466 | Protein MAK16 homolog                                                       | MAK16      |
| 6,0013 | 5,0391 | Mediator of DNA damage checkpoint protein 1                                 | MDC1       |
| 2,1020 | 1,8919 | Midasin                                                                     | MDN1       |
| 3,7258 | 2,8227 | Methyl-CpG-binding protein 2                                                | MECP2      |
| 1,5049 | 0,7477 | Mediator of RNA polymerase II transcription subunit 15                      | MED15      |
| 1,5297 | 1,0902 | Mediator of RNA polymerase II transcription subunit 6                       | MED6       |
| 2,2304 | 3,6387 | Antigen KI-67                                                               | MKI67      |
| 1,6823 | 1,8192 | U3 small nucleolar ribonucleoprotein protein MPP10                          | MPHOSPH10  |
| 1,4856 | 1,2393 | Myosin phosphatase Rho-interacting protein                                  | MPRIIP     |
| 1,4130 | 2,3333 | mRNA turnover protein 4 homolog                                             | MRT04      |
| 1,6398 | 1,5918 | DNA mismatch repair protein Msh2                                            | MSH2       |
| 1,3441 | 0,9219 | DNA mismatch repair protein Msh6                                            | MSH6       |
| 1,7886 | 0,7443 | Metastasis-associated protein MTA2                                          | MTA2       |
| 2,4980 | 1,3658 | Metal-response element-binding transcription factor 2                       | MTF2       |
| 3,4682 | 5,1108 | Myb-binding protein 1A                                                      | MYBBP1A    |
| 2,3668 | 1,5688 | Myosin-10                                                                   | MYH10      |
| 1,9810 | 1,6852 | Myosin-9                                                                    | MYH9       |
| 2,0480 | 0,7459 | Unconventional myosin-Ib                                                    | MYO1B      |
| 1,4272 | 4,6683 | Myelin transcription factor 1-like protein                                  | MYT1L      |
| 3,1142 | 0,7509 | N-acetyltransferase 10                                                      | NAT10      |
| 2,9173 | 3,6937 | <b>Nucleolin</b>                                                            | <b>NCL</b> |

|        |               |                                                                  |             |
|--------|---------------|------------------------------------------------------------------|-------------|
| 2,6296 | 1,1920        | Neuroguidin                                                      | NGDN        |
| 3,3918 | 4,5364        | MKI67 FHA domain-interacting nucleolar phosphoprotein            | NIFK        |
| 2,3136 | 1,2635        | 60S ribosome subunit biogenesis protein NIP7 homolog             | NIP7        |
| 1,2493 | 1,9966        | NF-kappa-B-activating protein;NKAP-like protein                  | NKAP;NKAPL  |
| 1,3659 | 2,1529        | Notchless protein homolog 1                                      | NLE1        |
| 2,2462 | 0,9134        | Nicotinamide/nicotinic acid mononucleotide adenylyltransferase 1 | NMNAT1      |
| 2,1969 | 3,5726        | Nucleolar complex protein 2 homolog                              | NOC2L       |
| 3,5683 | 2,4030        | Nucleolar complex protein 3 homolog                              | NOC3L       |
| 2,1677 | 1,3241        | Nucleolar complex protein 4 homolog                              | NOC4L       |
| 1,8872 | 2,7030        | Nucleolar protein 10                                             | NOL10       |
| 2,3551 | 1,0486        | Nucleolar protein 11                                             | NOL11       |
| 1,9948 | 1,1984        | Nucleolar protein 6                                              | NOL6        |
| 1,8760 | 2,8836        | Nucleolar protein 7                                              | NOL7        |
| 2,3551 | 2,3132        | Nucleolar protein 8                                              | NOL8        |
| 1,8825 | 2,4925        | Polynucleotide 5-hydroxyl-kinase NOL9                            | NOL9        |
| 1,9142 | 2,9375        | Nucleolar and coiled-body phosphoprotein 1                       | NOLC1       |
| 2,7865 | 4,0995        | Non-POU domain-containing octamer-binding protein                | NONO        |
| 2,9998 | 4,6736        | Nucleolar protein 14                                             | NOP14       |
| 3,2568 | 1,5258        | Nucleolar protein 16                                             | NOP16       |
| 4,0739 | 5,8043        | Probable 28S rRNA (cytosine(4447)-C(5))-methyltransferase        | NOP2        |
| 2,4831 | 3,0370        | Nucleolar protein 56                                             | NOP56       |
| 3,2937 | <b>2,0602</b> | <b>Nucleophosmin</b>                                             | <b>NPM1</b> |
| 2,1155 | 1,4867        | Nucleoplasmin-3                                                  | NPM3        |
| 2,6281 | 3,3155        | Ribosome biogenesis protein NSA2 homolog                         | NSA2        |
| 1,8647 | 1,4105        | E3 SUMO-protein ligase NSE2                                      | NSMCE2      |
| 3,0715 | 2,4545        | Nuclear mitotic apparatus protein 1                              | NUMA1       |
| 2,0293 | 1,2580        | Nuclear valosin-containing protein-like                          | NVL         |
| 2,0972 | 2,8510        | p21-activated protein kinase-interacting protein 1               | PAK1IP1     |
| 3,2052 | 0,8923        | Poly [ADP-ribose] polymerase 1                                   | PARP1       |
| 1,7778 | 1,8535        | Protein polybromo-1                                              | PBRM1       |
| 2,0428 | 3,8468        | Protein RRP5 homolog                                             | PDCD11      |
| 3,1208 | 2,1211        | Proline-, glutamic acid- and leucine-rich protein 1              | PELP1       |
| 2,9570 | 1,1176        | Pescadillo homolog                                               | PES1        |
| 3,1393 | 1,1552        | Prohibitin-2                                                     | PHB2        |
| 2,0600 | 0,8946        | Histone lysine demethylase PHF8                                  | PHF8        |
| 2,4179 | 3,2203        | PH-interacting protein                                           | PHIP        |
| 2,3744 | 2,0860        | Ribonucleases P/MRP protein subunit POP1                         | POP1        |
| 4,9385 | 5,1363        | Suppressor of SWI4 1 homolog                                     | PPAN-P2RY11 |
| 1,4190 | 0,9349        | Peptidyl-prolyl cis-trans isomerase A                            | PPIA        |
| 1,3919 | 2,2918        | Serine/threonine-protein phosphatase PP1-beta catalytic subunit  | PPP1CB      |
| 2,7391 | 0,6762        | DNA-dependent protein kinase catalytic subunit                   | PRKDC       |
| 3,0218 | 2,8645        | PC4 and SFRS1-interacting protein                                | PSIP1       |
| 3,7072 | 1,8511        | Periodic tryptophan protein 1 homolog                            | PWP1        |
| 2,3078 | 1,6087        | Periodic tryptophan protein 2 homolog                            | PWP2        |
| 1,2198 | 2,2100        | GTP-binding nuclear protein Ran                                  | RAN         |
| 1,4571 | 1,4034        | Histone-binding protein RBBP4                                    | RBBP4       |

|        |        |                                              |          |
|--------|--------|----------------------------------------------|----------|
| 2,2588 | 3,8934 | RNA-binding protein 14                       | RBM14    |
| 1,9925 | 1,4997 | Probable RNA-binding protein 19              | RBM19    |
| 4,6944 | 2,0638 | RNA-binding protein 28                       | RBM28    |
| 3,8715 | 4,6912 | RNA-binding protein 34                       | RBM34    |
| 1,4482 | 1,8701 | RNA-binding protein 8A                       | RBM8A    |
| 2,2848 | 3,0370 | RNA-binding motif protein, X chromosome      | RBMX     |
| 3,1362 | 2,7533 | Regulator of chromosome condensation         | RCC1     |
| 2,2262 | 1,6531 | RNA exonuclease 4                            | REXO4    |
| 1,5457 | 0,9420 | Replication factor C subunit 1               | RFC1     |
| 1,2174 | 1,7923 | Replication factor C subunit 2               | RFC2     |
| 2,7269 | 1,1018 | Telomere-associated protein RIF1             | RIF1     |
| 2,6765 | 3,8658 | Ribosome production factor 1                 | RPF1     |
| 2,7714 | 3,1937 | Ribosome production factor 2 homolog         | RPF2     |
| 2,6137 | 3,1016 | 60S ribosomal protein L10                    | RPL10    |
| 2,5289 | 1,0385 | 60S ribosomal protein L11                    | RPL11    |
| 2,4151 | 1,7471 | 60S ribosomal protein L13                    | RPL13    |
| 2,6098 | 3,8113 | 60S ribosomal protein L13a                   | RPL13A   |
| 2,7674 | 2,2360 | 60S ribosomal protein L14                    | RPL14    |
| 2,0396 | 3,2779 | 60S ribosomal protein L15                    | RPL15    |
| 3,5313 | 1,8920 | 60S ribosomal protein L18                    | RPL18    |
| 2,7361 | 3,8088 | 60S ribosomal protein L18a                   | RPL18A   |
| 2,8662 | 3,5085 | 60S ribosomal protein L21                    | RPL21    |
| 4,0759 | 5,4227 | 60S ribosomal protein L23a                   | RPL23A   |
| 2,2629 | 3,5709 | 60S ribosomal protein L26                    | RPL26    |
| 3,7918 | 2,1390 | 60S ribosomal protein L27                    | RPL27    |
| 4,8333 | 5,7166 | 60S ribosomal protein L27a                   | RPL27A   |
| 2,3571 | 1,6852 | 60S ribosomal protein L28                    | RPL28    |
| 3,4481 | 2,6418 | 60S ribosomal protein L3                     | RPL3     |
| 5,1083 | 4,7525 | 60S ribosomal protein L32                    | RPL32    |
| 1,9921 | 3,1082 | 60S ribosomal protein L34                    | RPL34    |
| 2,9679 | 2,7037 | 60S ribosomal protein L35a                   | RPL35A   |
| 2,4334 | 4,4540 | 60S ribosomal protein L36                    | RPL36    |
| 2,5703 | 2,3391 | 60S ribosomal protein L4                     | RPL4     |
| 2,9956 | 2,9257 | 60S ribosomal protein L5                     | RPL5     |
| 2,5501 | 3,6173 | 60S ribosomal protein L6                     | RPL6     |
| 3,3193 | 1,8135 | 60S ribosomal protein L7                     | RPL7     |
| 3,4192 | 2,6476 | 60S ribosomal protein L7a                    | RPL7A    |
| 1,4624 | 1,0244 | 60S ribosomal protein L7-like 1              | RPL7L1   |
| 2,8245 | 3,2000 | 60S ribosomal protein L8                     | RPL8     |
| 3,3734 | 3,3316 | 60S acidic ribosomal protein P1              | RPLP1    |
| 3,4208 | 1,8580 | 60S acidic ribosomal protein P2              | RPLP2    |
| 2,2949 | 1,6955 | Ribonuclease P protein subunit p30           | RPP30    |
| 1,2985 | 2,0673 | 40S ribosomal protein S11                    | RPS11    |
| 2,7561 | 1,1397 | 40S ribosomal protein S14                    | RPS14    |
| 1,8700 | 1,7803 | Active regulator of SIRT1                    | RPS19BP1 |
| 1,9480 | 0,8109 | 40S ribosomal protein S23                    | RPS23    |
| 1,8627 | 1,8852 | 40S ribosomal protein S24                    | RPS24    |
| 2,0512 | 1,9780 | 40S ribosomal protein S3a                    | RPS3A    |
| 2,2152 | 3,7698 | 40S ribosomal protein S6                     | RPS6     |
| 2,3653 | 2,2779 | 40S ribosomal protein S8                     | RPS8     |
| 2,7359 | 3,0458 | Ribosomal RNA processing protein 1 homolog A | RRP1     |
| 3,1184 | 2,8782 | RRP12-like protein                           | RRP12    |
| 2,9985 | 2,8537 | RRP15-like protein                           | RRP15    |
| 4,1806 | 5,3675 | Ribosomal RNA processing protein 1 homolog B | RRP1B    |
| 2,3326 | 1,7248 | Ribosomal RNA processing protein 36 homolog  | RRP36    |



|        |                |                                                                                  |              |
|--------|----------------|----------------------------------------------------------------------------------|--------------|
| 1,9134 | 1,3803         | Ribosomal RNA-processing protein 7 homolog A                                     | RRP7A        |
| 2,3450 | 2,6344         | Ribosomal RNA-processing protein 8                                               | RRP8         |
| 1,9295 | 3,1653         | U3 small nucleolar RNA-interacting protein 2                                     | RRP9         |
| 2,6724 | 2,5263         | Ribosome biogenesis regulatory protein homolog                                   | RRS1         |
| 2,0376 | 2,2352         | Round spermatid basic protein 1-like protein                                     | RSBN1L       |
| 1,3579 | 1,5472         | Remodeling and spacing factor 1                                                  | RSF1         |
| 2,9922 | 4,6573         | Ribosomal L1 domain-containing protein 1                                         | RSL1D1       |
| 1,5620 | 3,0653         | Probable ribosome biogenesis protein RLP24                                       | RSL24D1      |
| 1,3345 | 0,9517         | tRNA-splicing ligase RtcB homolog                                                | RTCB         |
| 4,9193 | 1,6924         | Scaffold attachment factor B1                                                    | SAFB         |
| 1,4793 | 1,2945         | U4/U6.U5 tri-snRNP-associated protein 1                                          | SART1        |
| 1,8119 | 2,7092         | Sentrin-specific protease 3                                                      | SENP3        |
| 1,7933 | 0,9076         | Plasminogen activator inhibitor 1 RNA-binding protein                            | SERBP1       |
| 2,8286 | 1,3863         | Splicing factor 3B subunit 2                                                     | SF3B2        |
| 1,5210 | 2,5622         | Splicing factor 3B subunit 4                                                     | SF3B4        |
| 1,3828 | 0,9175         | Transcription activator BRG1                                                     | SMARCA4      |
| 2,0230 | 0,6770         | SWI/SNF complex subunit SMARCC1                                                  | SMARCC1      |
| 1,4402 | 1,2264         | Structural maintenance of chromosomes protein 1A                                 | SMC1A        |
| 2,9005 | 1,0818         | Structural maintenance of chromosomes protein 5                                  | SMC5         |
| 1,7436 | 2,1568         | Structural maintenance of chromosomes flexible hinge domain-containing protein 1 | SMCHD1       |
| 2,3830 | 2,8455         | SNW domain-containing protein 1                                                  | SNW1         |
| 2,5907 | 1,7429         | Spermatogenesis-associated protein 5                                             | SPATA5       |
| 2,5672 | 2,2388         | Msx2-interacting protein                                                         | SPEN         |
| 2,4393 | 1,5938         | Serum response factor-binding protein 1                                          | SRFBP1       |
| 1,6406 | 1,9874         | Serine/arginine-rich splicing factor 9                                           | SRSF9        |
| 1,4230 | 1,1621         | Lupus La protein                                                                 | SSB          |
| 3,2840 | 1,9000         | FACT complex subunit SSRP1                                                       | SSRP1        |
| 2,7542 | 2,2523         | Double-stranded RNA-binding protein Stauf homolog 1                              | STAU1        |
| 1,6098 | 0,9703         | SURP and G-patch domain-containing protein 2                                     | SUGP2        |
| 1,8460 | 1,4655         | FACT complex subunit SPT16                                                       | SUPT16H      |
| 1,3450 | 1,6434         | Heterogeneous nuclear ribonucleoprotein Q                                        | SYNCRIP      |
| 2,6713 | 2,7237         | TATA-binding protein-associated factor 2N                                        | TAF15        |
| 7,3129 | <b>10,4432</b> | <b>Threonine aspartase 1</b>                                                     | <b>TASP1</b> |
| 2,2609 | 0,9266         | Transducin beta-like protein 3                                                   | TBL3         |
| 1,7632 | 1,1928         | Transcription elongation regulator 1                                             | TCERG1       |
| 2,3202 | 1,4735         | Testis-expressed sequence 10 protein                                             | TEX10        |
| 3,9787 | 2,1365         | Transcription factor A, mitochondrial                                            | TFAM         |
| 3,1735 | 1,2028         | Tight junction protein ZO-1                                                      | TJP1         |
| 1,5872 | 0,9450         | Target of EGR1 protein 1                                                         | TOE1         |
| 3,4893 | <b>2,1030</b>  | <b>DNA topoisomerase 2-alpha</b>                                                 | <b>TOP2A</b> |
| 1,9182 | <b>3,3554</b>  | <b>DNA topoisomerase 2-beta</b>                                                  | <b>TOP2B</b> |
| 2,0187 | 0,9680         | Tumor suppressor p53-binding protein 1                                           | TP53BP1      |
| 2,7486 | 1,1862         | TRMT1-like protein                                                               | TRMT1L       |
| 1,5322 | 2,2831         | Nucleolar transcription factor 1                                                 | UBTF         |
| 6,8028 | 4,4660         | Ubiquitin carboxyl-terminal hydrolase 36                                         | USP36        |
| 3,1106 | 2,1976         | Probable U3 small nucleolar RNA-associated protein 11                            | UTP11L       |

|        |        |                                                           |         |
|--------|--------|-----------------------------------------------------------|---------|
| 2,8875 | 2,3968 | U3 small nucleolar RNA-associated protein<br>14 homolog A | UTP14A  |
| 1,8621 | 2,2077 | U3 small nucleolar RNA-associated protein<br>15 homolog   | UTP15   |
| 1,9902 | 3,4326 | U3 small nucleolar RNA-associated protein<br>18 homolog   | UTP18   |
| 2,6422 | 1,6148 | Small subunit processome component 20<br>homolog          | UTP20   |
| 2,7767 | 2,6975 | Something about silencing protein 10                      | UTP3    |
| 2,2812 | 1,3586 | U3 small nucleolar RNA-associated protein<br>6 homolog    | UTP6    |
| 1,8716 | 2,4485 | WW domain-binding protein 11                              | WBP11   |
| 3,0287 | 1,3139 | Ribosome biogenesis protein WDR12                         | WDR12   |
| 2,8195 | 3,2388 | WD repeat-containing protein 18                           | WDR18   |
| 3,4648 | 1,2625 | WD repeat-containing protein 3                            | WDR3    |
| 2,9750 | 2,4686 | pre-mRNA 3 end processing protein<br>WDR33                | WDR33   |
| 1,9633 | 0,7948 | WD repeat-containing protein 36                           | WDR36   |
| 5,0338 | 1,0301 | WD repeat-containing protein 43                           | WDR43   |
| 3,3921 | 2,6212 | WD repeat-containing protein 46                           | WDR46   |
| 1,3990 | 1,0967 | WD repeat-containing protein 5                            | WDR5    |
| 2,6216 | 1,2233 | WD repeat-containing protein 74                           | WDR74   |
| 4,0020 | 0,8301 | WD repeat-containing protein 76                           | WDR76   |
| 1,2599 | 1,0713 | Protein Wiz                                               | WIZ     |
| 2,3551 | 1,4047 | DNA repair protein XRCC1                                  | XRCC1   |
| 1,6563 | 0,8002 | Nuclease-sensitive element-binding protein<br>1           | YBX1    |
| 2,9222 | 1,4798 | YTH domain-containing protein 1                           | YTHDC1  |
| 1,6568 | 1,5233 | Zinc finger CCCH-type antiviral protein 1                 | ZC3HAV1 |
| 3,3099 | 2,5689 | Zinc finger RNA-binding protein                           | ZFR     |
| 2,0564 | 1,6639 | Zinc finger MYM-type protein 4                            | ZMYM4   |
| 1,6835 | 1,7883 | Zinc finger protein 280C                                  | ZNF280C |
| 2,6580 | 2,7459 | Zinc finger protein 638                                   | ZNF638  |
